# Supplementary material for: Bilingualism and Biliteracy in Down Syndrome: Insights From a Case Study
Source: PubMed Central journal article supplement (PMC5132129; doi:10.1111/lang.12179), 2016-06-01
Supplement: LANG-66-945-s001.pdf [file LANG-66-945-s001.pdf]

**Supporting Information for: Burgoyne, K., Duff, F. J., Nielsen, D., Ulicheva, A., & Snowling, M. J. Bilingualism and biliteracy in Down syndrome: Insights from a case study. Article accepted in *Language Learning* on 12 January 2016.**

Appendix S1: Overview of Test Protocol

| Tests                                             | Participants |    |     |     |
|---------------------------------------------------|--------------|----|-----|-----|
|                                                   | MB           | DS | TDE | TDR |
| <b>T1</b>                                         |              |    |     |     |
| Literacy Skills                                   |              |    |     |     |
| YARC Early Word Reading                           | ×            |    |     |     |
| YARC Single Word Reading                          | ×            |    |     |     |
| <b>T2</b>                                         |              |    |     |     |
| Nonverbal Ability                                 |              |    |     |     |
| WPPSI-III Block Design and Object Assembly        | ×            | ×  | ×   |     |
| WMTBC Block recall                                | ×            | ×  | ×   |     |
| Verbal Memory                                     |              |    |     |     |
| WMBTC Digit Recall and Word Recall                | ×            | ×  | ×   |     |
| Language Skills                                   |              |    |     |     |
| BPVS                                              | ×            | ×  | ×   |     |
| BPVS Russian translation                          | ×            |    |     |     |
| CELF-IV Expressive Vocabulary                     | ×            | ×  | ×   |     |
| CELF-IV Expressive Vocabulary Russian translation | ×            |    |     |     |
| Literacy Skills                                   |              |    |     |     |
| Syllable deletion English                         | ×            | ×  | ×   |     |
| Syllable deletion Russian                         | ×            |    |     | ×   |
| Phoneme deletion English                          | ×            | ×  | ×   |     |

---

|                                 |   |   |   |   |
|---------------------------------|---|---|---|---|
| Phoneme deletion Russian        | × |   |   | × |
| Phoneme isolation English       | × | × | × |   |
| Phoneme isolation Russian       | × |   |   | × |
| Letter Knowledge English        | × | × | × |   |
| Letter Knowledge Russian        | × |   |   | × |
| Bespoke Word Reading English    | × | × | × |   |
| Bespoke Word Reading Russian    | × |   |   | × |
| YARC Early Word Reading         | × | × | × |   |
| YARC Single Word Reading        | × | × | × |   |
| Bespoke Nonword Reading English | × | × | × |   |
| Bespoke Nonword Reading Russian | × |   |   | × |
| GNWRT Nonword Reading           | × | × | × |   |
| YARC passage reading            | × | × | × |   |

---

T3

Literacy Skills

|                          |   |
|--------------------------|---|
| YARC single word reading | × |
| YARC passage reading     | × |

---

Appendix S2: Syllable Deletion Task in Russian and English

| Russian   |                                     |                                 | English   |                    |        |
|-----------|-------------------------------------|---------------------------------|-----------|--------------------|--------|
| Test item | Syllable to delete                  | Answer                          | Test item | Syllable to delete | Answer |
| 1         | цветок<br>/tɕvʲɪə'tok/<br>“flower”  | /tok/<br>“current”              | snowman   | snow               | man    |
| 2         | носок<br>/nɐ'sok/<br>“sock”         | /na/ “but”<br>/sok/ “juice”     | seaside   | sea                | side   |
| 3         | больной<br>/bɐl'i'noj/<br>“patient” | /bol'i/ “pain”<br>OR /bɐl'i/    | bedroom   | room               | bed    |
| 4         | ножка<br>/'noʒkə/<br>“leg”          | /ka/<br>/noʒ/ “knife”           | rainbow   | bow                | rain   |
| 5         | забор<br>/zɐ'bor/<br>“fence”        | /za/ “behind”<br>/bor/ “forest” | teapot    | tea                | pot    |
| 6         | чайник<br>/'tɕajnʲɪk/<br>“teapot”   | /nʲɪk/<br>/tɕaj/ “tea”          | football  | ball               | foot   |

---

|    |                                                       |                                     |            |       |       |
|----|-------------------------------------------------------|-------------------------------------|------------|-------|-------|
| 7  | дворник<br>/nʲik/<br>/'dvornʲək/<br>“yard-<br>keeper” | /dvor/ “yard”                       | toothbrush | brush | tooth |
| 8  | пирог<br>/pʲi/<br>/pʲə'rok/<br>“pie”                  | /rok/ “horn”                        | rowboat    | row   | boat  |
| 9  | город<br>/'gorət/<br>“city”                           | /rot/ “mouth”<br>OR /rat/<br>“glad” | peanut     | pea   | nut   |
| 10 | мечта<br>/mʲɛtə'ta/<br>“dream”                        | /mʲɛtə/<br>“sword” OR<br>/mʲitə/    | jigsaw     | saw   | jig   |

---

*Note.* If translation is not given, then the sequence of phonemes does not represent an existing word in Russian.

Appendix S3: Phoneme Deletion Task in Russian and English

| Russian   |                          |                         | English   |                   |        |
|-----------|--------------------------|-------------------------|-----------|-------------------|--------|
| Test item | Phoneme to delete        | Answer                  | Test item | Phoneme to delete | Answer |
| 1         | танк /tank/<br>“tank”    | /n/<br>/tak/ “so”       | nest      | s                 | net    |
| 2         | смех /smʲɛx/<br>“laugh”  | /s/<br>/mʲɛx/ “fur”     | smile     | s                 | mile   |
| 3         | ручка /rʉtʲɛkə/<br>“pen” | /tʲɛ/<br>/rə'ka/ “hand” | window    | n                 | widow  |
| 4         | зуб /zup/<br>“tooth”     | /p/<br>/zu/             | team      | m                 | tea    |
| 5         | нож /noʃ/<br>“knife”     | /n/<br>/oʃ/             | ball      | b                 | all    |
| 6         | рот /rot/<br>“mouth”     | /r/<br>/ot/ “from”      | meal      | m                 | eel    |
| 7         | двор /dvor/<br>“yard”    | /d/<br>/vor/ “thief”    | cloud     | c                 | loud   |
| 8         | Нос /nos/<br>“nose”      | /s/<br>/no/ “but”       | bike      | k                 | by     |
| 9         | Врун /vrʉn/<br>“liar”    | /n/<br>/vru/ “I lie”    | train     | n                 | tray   |
| 10        | Сок /sok/<br>“juice”     | /k/<br>/so/             | pile      | l                 | pie    |

*Note.* Order of item presentation for English items was: ball, meal, cloud, smile, team, bike, train, pile, window, nest.

Appendix S4: Initial and Final Phoneme Isolation Tasks in Russian and English

| Initial phoneme isolation |                                       |           |        | Final phoneme isolation             |         |           |        |
|---------------------------|---------------------------------------|-----------|--------|-------------------------------------|---------|-----------|--------|
| Russian                   |                                       | English   |        | Russian                             |         | English   |        |
| Test item                 | Answer                                | Test item | Answer | Test item                           | Answer  | Test item | Answer |
| 1                         | Кот /kot/ “cat”<br>/k/                | cat       | k      | Нож /noʂ/ “knife”<br>/ʂ/            | mug     | g         |        |
| 2                         | Брюки /brʲukʲə/ “trousers”<br>/b/     | spider    | s      | Стол /stol/ “table”<br>/l/          | bread   | d         |        |
| 3                         | Мяч /mʲat͡ɕ/ “ball”<br>/m/            | leg       | l      | Утюг /uˈtʲuk/ “iron”<br>/k/         | oven    | n         |        |
| 4                         | Цветок /t͡svʲət͡ɔk/ “flower”<br>/t͡s/ | planet    | p      | Арбуз /ərˈbus/ “watermelon”<br>/s/  | atlas   | s         |        |
| 5                         | Стул /stul/ “chair”<br>/s/            | clock     | k      | Банан /bɐˈnan/ “banana”<br>/n/      | rabbit  | t         |        |
| 6                         | Тарелка /tɐˈrʲelkə/ “plate”<br>/t/    | factory   | f      | Перец /ˈpʲerʲɛts/ “pepper”<br>/t͡s/ | hammock | k         |        |
| 7                         | Лампа /ˈlampə/ “lamp”<br>/l/          | window    | w      | Шкаф /ʂkaf/ “wardrobe”<br>/f/       | pram    | m         |        |
| 8                         | Кровать /krɐˈvati/ “bed”<br>/k/       | dragon    | d      | Цветок /t͡svʲət͡ɔk/ “flower”<br>/k/ | cobweb  | b         |        |
| 9                         | Зонт /zont/ “umbrella”<br>/z/         | tent      | t      | Бант /bant/ “bow”<br>/t/            | lamp    | p         |        |

---

|    |                        |     |      |   |                       |     |      |    |
|----|------------------------|-----|------|---|-----------------------|-----|------|----|
| 10 | Хлеб /хлѣп/<br>“bread” | /x/ | frog | f | Сыр /сѣр/<br>“cheese” | /r/ | dish | sh |
|----|------------------------|-----|------|---|-----------------------|-----|------|----|

---

Appendix S5: Word and Nonword Reading Tasks in Russian and English

| Words                                  |           | Nonwords          |         |
|----------------------------------------|-----------|-------------------|---------|
| Russian                                | English   | Russian           | English |
| 1 Слон /slon/ “elephant”               | tram      | Дуг /duk/         | fet     |
| 2 Сад /sat/ “garden”                   | bed       | Туль /tuli/       | joth    |
| 3 Мост /most/ “bridge”                 | dust      | Луп /lup/         | vas     |
| 4 Гриб /grʲip/ “mushroom”              | crab      | Шень /ʂeni/       | weth    |
| 5 Ёлка /'jolkə/ “pine tree”            | twin      | Коле /kolie/      | reco    |
| 6 Торт /tort/ “cake”                   | sand      | Расть /rastʲi/    | culch   |
| 7 Гвоздь /'gvostʲi/ “nail”             | plant     | Кмас /kmas/       | brep    |
| 8 Взгляд /vzglʲat/ “look”              | napkin    | Моза /moza/       | kety    |
| 9 Школа /'ʂkolə/ “school”              | stamp     | Напа /napa/       | loda    |
| 10 Скрипка /'skrʲipkə/ “violin”        | pumpkin   | Ланка /lanka/     | lesta   |
| 11 Детство /'detstvə/ “childhood”      | nostril   | Несто /nʲesto/    | birgo   |
| 12 Равнина /rɛv'nʲinə/ “plain”         | plastic   | Полос /polos/     | nivel   |
| 13 Поддержка /pɔ'ddʲerskə/ “support”   | bandstand | Пасок /pasok/     | halon   |
| 14 Животное /zə'votnəjə/ “animal”      | skeleton  | Снечка /snʲetskə/ | prento  |
| 15 Велосипед /vɛləsʲɪə'pʲet/ “bicycle” | tarantula | Порехи /porʲexʲi/ | tenama  |

*Note.* For nonwords, any stress pattern was considered correct. In Russian the pronunciation of vowels depends on stress assignment (unstressed vowels become reduced). Therefore, no vowel reduction is marked in the transcription.
